# Supplementary material for: Kinesin motility is driven by subdomain dynamics
Source: eLife journal article supplement (doi:10.7554/elife.28948), 2017-11-07
Supplement: supp [file elife-28948-supp-v1.zip]

Archive with 16 entries (16 files):
- elife_poa_e28948_Video_S2.mp4
- elife_poa_e28948_Figure_3_figure_supplement_1.jpg
- elife_poa_e28948_Video_S4.mp4
- elife_poa_e28948_Transparent_Reporting_File.pdf
- elife_poa_e28948_Figure_4_figure_supplement_1.jpg
- elife_poa_e28948_Video_S1.mp4
- elife_poa_e28948_Supplementary_File_1.pdf
- elife_poa_e28948_Figure_7_figure_supplement_1.jpg
- elife_poa_e28948_Video_S5.mp4
- elife_poa_e28948_Supplementary_File_3.pdf
- elife_poa_e28948_Supplementary_File_2.pdf
- elife_poa_e28948_Video_S3.mp4
- elife_poa_e28948_Figure_1_figure_supplement_1.pdf
- elife_poa_e28948_Figure_5_figure_supplement_1.jpg
- elife_poa_e28948_Figure_2_figure_supplement_1.jpg
- elife_poa_e28948_Figure_5_figure_supplement_2.jpg
