# Supplementary material for: Kinesin motility is driven by subdomain dynamics
Source: eLife journal article supplement (doi:10.7554/elife.28948), 2017-11-07
Supplement: supp [file elife-28948-supp-v1.zip › elife_poa_e28948_Figure_1_figure_supplement_1.pdf]

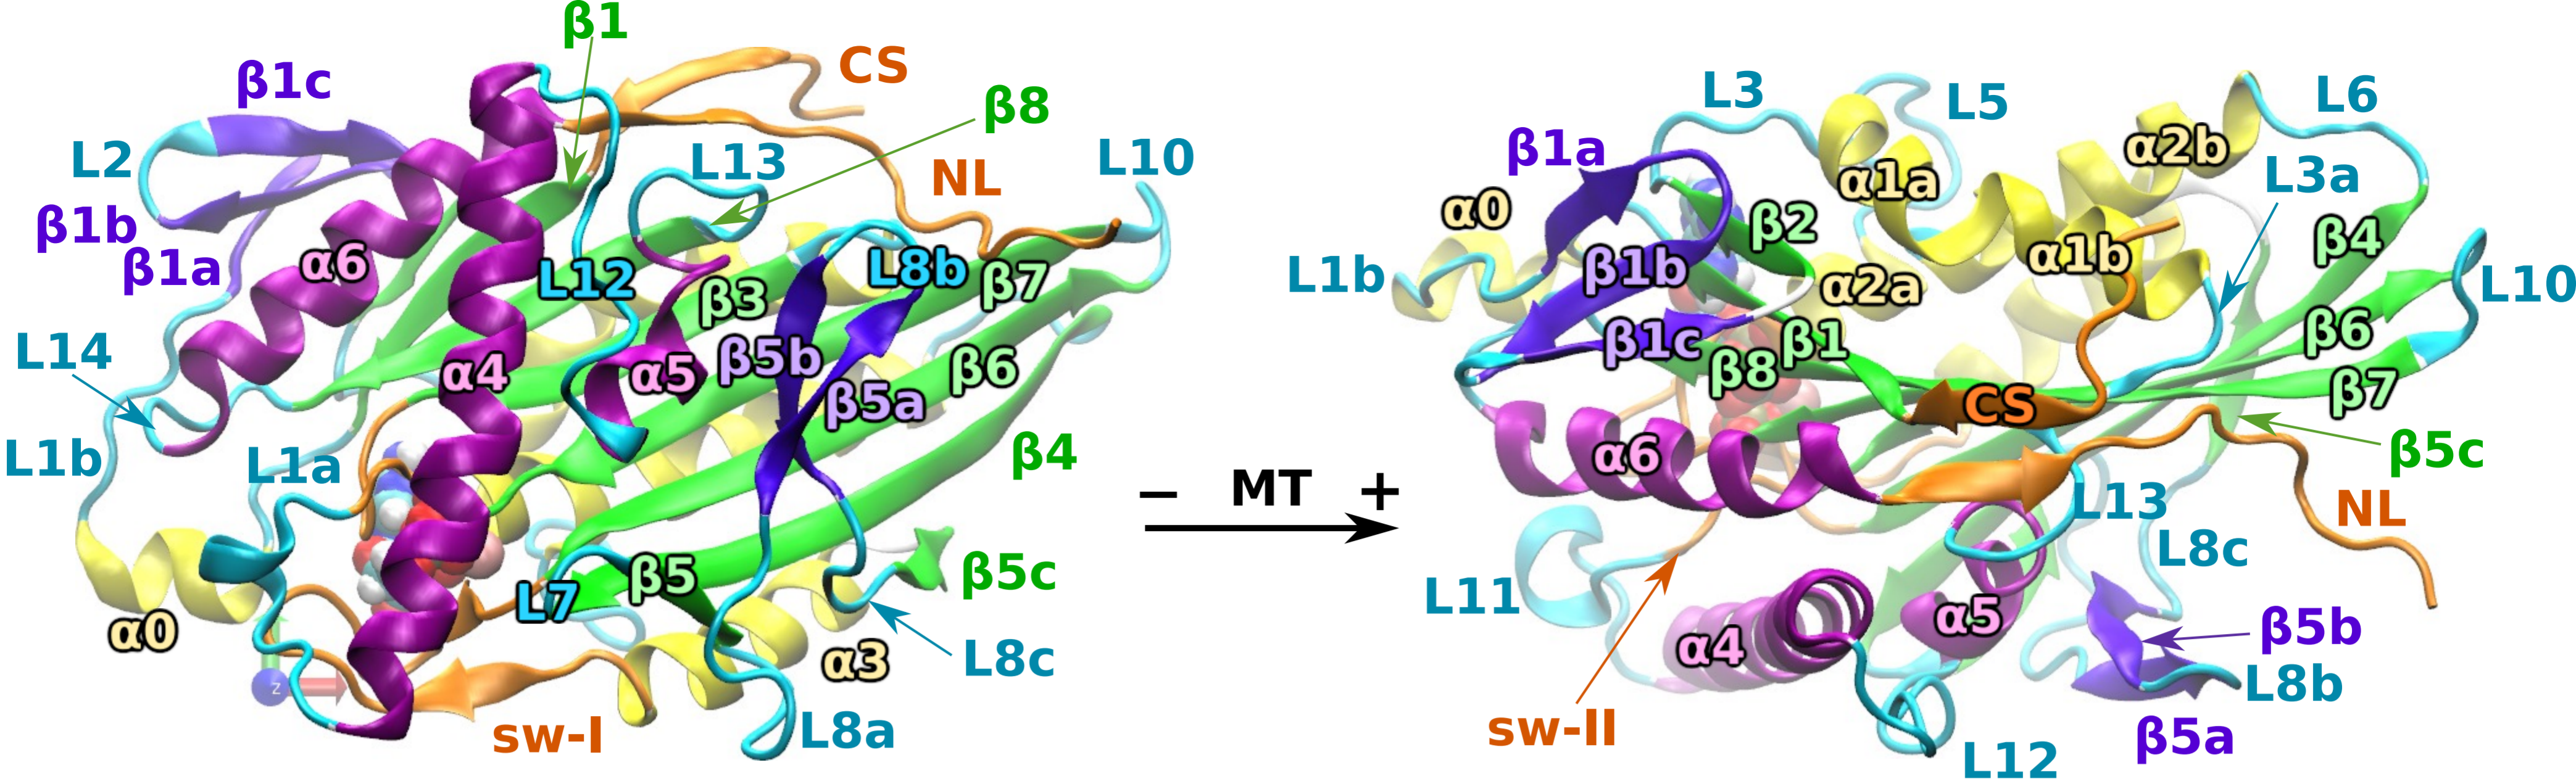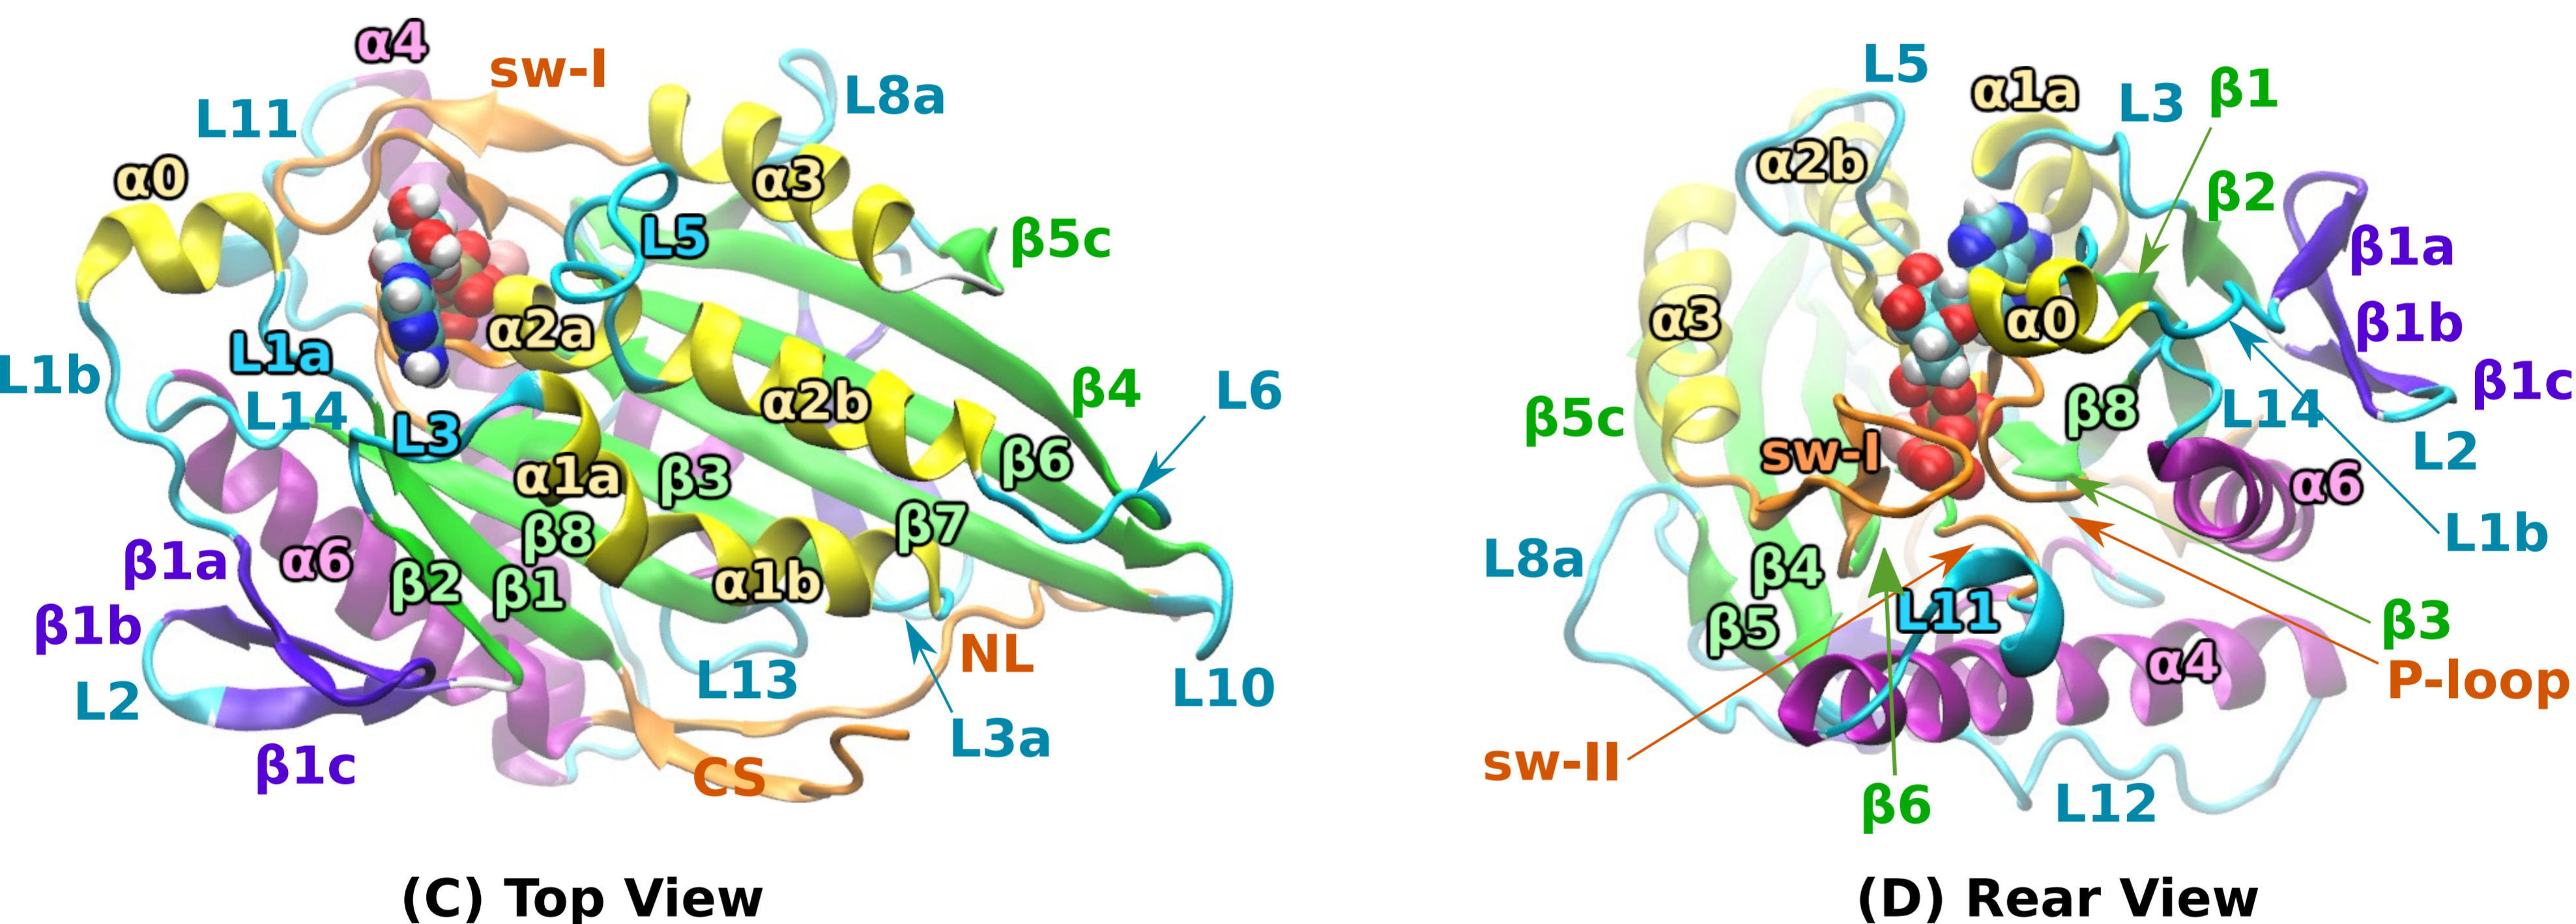

|     |       |        |         |        |         |        |         |       |
|-----|-------|--------|---------|--------|---------|--------|---------|-------|
| (E) | 1–9   | CS     | 54–58   | L3     | 142–145 | β5     | 222–233 | β7    |
|     | 10–16 | β1     | 59–66   | α1a    | 146–154 | L8a    | 234–236 | sw-II |
|     | 17–19 | L1a    | 67–75   | α1b    | 155–159 | β5a    | 237–245 | L11   |
|     | 20–26 | α0     | 76–78   | L3a    | 160–161 | L8b    | 246–271 | α4    |
|     | 27–31 | L1b    | 79–85   | β3     | 162–166 | β5b    | 272–281 | L12   |
|     | 32–35 | β1a    | 86–91   | P-loop | 167–170 | L8c    | 282–290 | α5    |
|     | 36–37 | β1a/b  | 92–97   | α2a    | 171–174 | β5c    | 291–295 | L13   |
|     | 38–42 | β1b    | 98–107  | L5     | 175–176 | β5c/α3 | 296–303 | β8    |
|     | 43–44 | L2     | 108–121 | α2b    | 177–189 | α3     | 304–307 | L14   |
|     | 45–48 | β1c    | 122–125 | L6     | 190–204 | sw-I   | 308–325 | α6    |
|     | 49–49 | β1c/β2 | 126–139 | β4     | 205–217 | β6     | 326–337 | NL    |
|     | 50–53 | β2     | 140–141 | L7     | 218–221 | L10    |         |       |
