# Supplementary material for: Kinesin motility is driven by subdomain dynamics
Source: eLife journal article supplement (doi:10.7554/elife.28948), 2017-11-07
Supplement: supp [file elife-28948-supp-v1.zip › elife_poa_e28948_Supplementary_File_1.pdf]

| PDB        | Nuc. | Conf. | sw-l    | $\alpha 4$ | L11 |
|------------|------|-------|---------|------------|-----|
| Kinesin-1  |      |       |         |            |     |
| 1BG2       | d    | pre   | 2       | -          | L   |
| 1GOJ       | d    | post  | L       | Ext.       | L   |
| 1MKJ       | d    | post  | 2       | -          | -   |
| 2KIN       | d    | post  | 2       | -          | -   |
| 2Y5W       | d    | post  | 2       | -          | -   |
| 2Y65       | d    | post  | 2       | -          | -   |
| 3KIN       | d    | post  | 2       | -          | -   |
| 3WRD-A     | O    | post  | 2       | -          | -   |
| 3WRD-B     | O    | post  | -       | -          | -   |
| 3X2T       | d    | post  | 2       | -          | -   |
| 4HNA       | T    | post  | $\beta$ | Ext.       | 1   |
| 4LNU       | O    | pre   | -       | Ext.       | L   |
| 5LT0       | O    | pre   | 2       | -          | -   |
| 5LT1       | O    | pre   | 2       | Ext.       | -   |
| 5LT2       | O    | pre   | $\beta$ | Ext.       | L   |
| 5LT3-A-D   | O    | pre   | -       | Ext.       | L   |
| 5LT3-E     | O    | pre   | -       | Ext.       | 1   |
| 5LT4       | O    | pre   | $\beta$ | Ext.       | L   |
| Kinesin-2  |      |       |         |            |     |
| 2VVG       | d    | post  | -       | -          | -   |
| 3B6U       | d    | post  | 2       | -          | -   |
| 3B6V       | d    | post  | -       | -          | -   |
| Kinesin-3  |      |       |         |            |     |
| 1I5S       | d    | pre   | 1       | Ext.       | -   |
| 1I6I       | T    | post  | L       | -          | -   |
| 1VfV       | T    | post  | -       | -          | -   |
| 1VfW       | T    | post  | L       | -          | -   |
| 1VfX       | T    | post  | L       | -          | -   |
| 1VfZ       | d    | pre   | 1       | Ext.       | 1   |
| 2OWM       | d    | post  | $\beta$ | -          | -   |
| 2ZFI       | d    | pre   | 2       | Ext.       | 1   |
| 2ZfJ       | d    | pre   | L       | -          | -   |
| 2ZfK       | d    | post  | L       | -          | -   |
| 2ZfL       | d    | post  | L       | -          | -   |
| 2ZfM       | d    | post  | $\beta$ | -          | -   |
| Kinesin-4  |      |       |         |            |     |
| 3ZFC       | T    | post  | $\beta$ | Ext.       | 1   |
| 3ZFD       | T    | post  | $\beta$ | Ext.       | 1   |
| Kinesin-5  |      |       |         |            |     |
| 1Ii6-A     | d    | pre   | 1       | Ext.       | -   |
| 1Ii6-B     | d    | pre   | 1       | -          | 1   |
| 1Q0B       | d    | post  | 1       | -          | -   |
| 1X88       | d    | post  | 1       | -          | -   |
| 1YRS       | d    | post  | 1       | -          | -   |
| 2FKY       | d    | post  | 1       | -          | -   |
| 2FL2       | d    | post  | 1       | -          | -   |
| 2FL6       | d    | post  | 1       | -          | -   |
| 2FME       | d    | post  | 1       | -          | 1   |
| 2G1Q       | d    | post  | 1       | -          | -   |
| 2GM1       | d    | post  | 1       | -          | 1   |
| 2IEH       | d    | post  | 1       | -          | -   |
| 2PG2       | d    | post  | 1       | -          | -   |
| 2Q2Y       | d    | post  | 1       | -          | -   |
| Kinesin-5  |      |       |         |            |     |
| 2Q2Z       | d    | post  | 1       | -          | -   |
| 2UYI       | d    | post  | 1       | -          | -   |
| 2UYM       | d    | post  | 1       | -          | -   |
| 2WOG-A     | d    | post  | 1       | -          | -   |
| 2WOG-B     | d    | post  | 1       | -          | -   |
| 2WOG-C     | d    | pre   | 1       | -          | -   |
| 2X2R-A     | d    | post  | 1       | -          | -   |
| 2X2R-B     | d    | post  | 1       | -          | -   |
| 2X2R-C     | d    | pre   | 1       | -          | -   |
| 2X7C       | d    | post  | 1       | -          | -   |
| 2X7D       | d    | post  | 1       | -          | -   |
| 2X7E       | d    | post  | 1       | -          | -   |
| 2XAE-A     | d    | post  | 1       | -          | -   |
| 2XAE-B     | d    | post  | 1       | -          | -   |
| 2XAE-C     | d    | pre   | 1       | -          | -   |
| 3CJO       | d    | post  | 1       | -          | -   |
| 3HQD       | T    | post  | $\beta$ | Ext.       | 1   |
| 3K3B       | d    | pre   | 1       | -          | -   |
| 3K5E       | d    | post  | 1       | -          | -   |
| 3KEN       | d    | post  | 1       | -          | -   |
| 3L9H       | d    | post  | 1       | -          | -   |
| 3WPN       | O    | post  | -       | -          | -   |
| 3ZCW       | d    | pre   | 3       | -          | -   |
| 4A1Z-A     | d    | pre   | 1       | -          | -   |
| 4A1Z-B     | d    | pre   | 1       | -          | 1   |
| 4A28-A     | d    | pre   | 1       | Ext.       | -   |
| 4A28-B     | d    | pre   | 1       | -          | 1   |
| 4A50       | d    | post  | 1       | -          | -   |
| 4A51-A     | d    | post  | 1       | -          | -   |
| 4A51-B     | d    | post  | 1       | -          | -   |
| 4A51-C     | d    | post  | 1       | -          | -   |
| 4A51-D     | d    | post  | 1       | -          | -   |
| 4A51-E     | d    | post  | 1       | -          | -   |
| 4A51-F     | d    | pre   | 1       | -          | -   |
| 4A5Y-A     | d    | pre   | 1       | Ext.       | -   |
| 4A5Y-B     | d    | pre   | 1       | -          | -   |
| 4A5Y-C     | d    | pre   | 1       | Ext.       | -   |
| 4AP0-A     | d    | post  | 1       | -          | L   |
| 4AP0-B     | d    | post  | 1       | -          | 1   |
| 4AP0-C     | d    | post  | 1       | -          | -   |
| 4AP0-D     | d    | post  | 1       | -          | -   |
| 4A57       | d    | pre   | 1       | -          | 2   |
| 4B7B       | d    | pre   | 1       | -          | -   |
| 4BBG       | d    | post  | 1       | -          | -   |
| 4BXN       | d    | pre   | -       | -          | L   |
| 4ZCA-A     | d    | pre   | -       | Ext.       | -   |
| 4ZCA-B     | d    | pre   | 1       | -          | 1   |
| 4ZHI       | d    | pre   | 1       | -          | -   |
| Kinesin-6  |      |       |         |            |     |
| 5X3E       | O    | pre   | L       | -          | -   |
| Kinesin-7  |      |       |         |            |     |
| 1T5C       | d    | post  | 1       | -          | 1   |
| 2XT3       | d    | pre   | 1       | -          | -   |
| 4A14       | d    | pre   | -       | -          | -   |
| Kinesin-8  |      |       |         |            |     |
| 3LRE       | d    | post  | L       | -          | -   |
| Kinesin-9  |      |       |         |            |     |
| 3NWN       | d    | post  | 1       | -          | -   |
| Kinesin-10 |      |       |         |            |     |
| 3BFN       | d    | pre   | -       | -          | -   |
| 3DC4       | d    | post  | -       | -          | -   |
| 3DCB       | T    | post  | -       | -          | L   |
| 3PXN       | d    | pre   | -       | -          | -   |
| Kinesin-12 |      |       |         |            |     |
| 4BN2       | d    | post  | L       | -          | L   |
| Kinesin-13 |      |       |         |            |     |
| 1RY6       | O    | pre   | 1       | Ext.       | 2   |
| 1V8J       | d    | pre   | 1       | Ext.       | -   |
| 1V8K       | T    | pre   | -       | -          | -   |
| 2GRY       | d    | pre   | -       | Ext.       | -   |
| 2HEH       | d    | pre   | -       | -          | -   |
| 3GBJ-A     | d    | pre   | -       | Ext.       | -   |
| 3GBJ-B     | d    | pre   | -       | -          | -   |
| 3GBJ-C     | d    | pre   | -       | -          | -   |
| 4UBF       | d    | pre   | -       | Ext.       | -   |
| 4Y05       | d    | pre   | -       | -          | -   |
| Kinesin-14 |      |       |         |            |     |
| 1CZ7       | d    | pre   | 1       | -          | -   |
| 1F9T       | d    | pre   | 2       | Ext.       | -   |
| 1F9U       | d    | pre   | 2       | Ext.       | -   |
| 1F9V       | d    | pre   | 1       | Ext.       | L   |
| 1F9W       | d    | pre   | -       | -          | -   |
| 1N6M       | d    | pre   | -       | -          | -   |
| 1SDM       | d    | post  | 1       | -          | L   |
| 2H58       | d    | pre   | L       | Ext.       | -   |
| 2NCD       | d    | pre   | 1       | -          | -   |
| 2REP       | d    | post  | 1       | -          | -   |
| 3CNZ       | d    | post  | 1       | -          | -   |
| 3COB-A     | d    | post  | 1       | Ext.       | L   |
| 3COB-B     | d    | post  | 1       | -          | -   |
| 3H4S       | d    | post  | 1       | Ext.       | L   |
| 3KAR       | d    | pre   | 2       | Ext.       | L   |
| 3L1C-A     | d    | pre   | -       | -          | L   |
| 3L1C-B     | d    | post  | -       | -          | -   |
| 3T0Q       | d    | post  | 2       | Ext.       | L   |
| 3U06-A     | d    | pre   | 2       | -          | -   |
| 3U06-B     | d    | post  | 1       | -          | -   |
| 4ETP       | d    | pre   | 3       | Ext.       | L   |
| 4FRZ-A     | d    | post  | -       | -          | -   |
| 4FRZ-B     | d    | post  | L       | -          | -   |
| 4GKR       | d    | pre   | 2       | -          | -   |
| 4H1G       | d    | pre   | 1       | Ext.       | -   |
| 4OZQ-A     | d    | post  | -       | Ext.       | L   |
| 4OZQ-B     | d    | post  | $\beta$ | Ext.       | -   |
| 5HLE       | d    | pre   | 1       | -          | -   |

**Supplementary File 1. Conformational variability of kinesin.** Only x-ray structures with resolution better than 3.7 Å are considered (117 PDB structures in total). PDB 4HNA and 4LNU (Kin-1) are the only x-ray structures of kinesin-MT complexes. If chains within the same PDB file differ in conformation, they are listed individually, as for 3WRD-A and 3WRD-B. Nuc.: Nucleotide state (d: ADP, T: ATP-analog, O: APO). Conf.: pre/post-stroke conformations defined based on the relative positioning of  $\alpha 4$  and  $\alpha 6$  (??C,D). For sw-l and L11, number 1-3: approximate number of  $\alpha$ -helical turns, L: when they form a mostly visible loop without a clear secondary structure, and '-': mostly invisible. For sw-l, ' $\beta$ ': a pseudo-hairpin. For  $\alpha 4$ , 'Ext.': the N-terminal side is extended, '-': otherwise. Sw-l takes pseudo- $\beta$ -hairpin or  $\alpha$ -helix conformations, or it is disordered. Similar variations are observed for L11 with no clear relation to the nucleotide state.
