# Supplementary material for: Kinesin motility is driven by subdomain dynamics
Source: eLife journal article supplement (doi:10.7554/elife.28948), 2017-11-07
Supplement: supp [file elife-28948-supp-v1.zip › elife_poa_e28948_Supplementary_File_2.pdf]

**(A) ATP**

| HB Broken | domain                 | t(ns)   | occ  |
|-----------|------------------------|---------|------|
| K240-Y307 | L11-L14                | 229.44  | 0.83 |
| K240-E311 | L11- $\alpha$ 6        | 634.80  | 0.81 |
| D147-S149 | L8a-L8a                | 894.24  | 0.85 |
| S224-N332 | $\beta$ 7-NL           | 918.24  | 0.81 |
| G76-N332  | L3a-NL                 | 920.40  | 0.91 |
| R190-D231 | sw-l- $\beta$ 7        | 1042.56 | 0.99 |
| T92-D231  | $\alpha$ 2a- $\beta$ 7 | 1340.16 | 0.97 |
| E96-R190  | $\alpha$ 2a-sw-l       | 1584.00 | 0.93 |
| E136-H191 | $\beta$ 4-sw-l         | 1677.12 | 0.81 |
| T195-N198 | sw-l-sw-l              | 1825.68 | 0.97 |
| A193-S201 | sw-l-sw-l              | 1826.16 | 0.93 |
| N216-Q221 | $\beta$ 6-L10          | 2016.72 | 0.96 |
| R203-E250 | sw-l- $\alpha$ 4       | 3593.28 | 0.86 |
| HB Formed | domain                 | t(ns)   | occ  |
| A83-L232  | $\beta$ 3- $\beta$ 7   | 1332.00 | 0.87 |
| E136-R190 | $\beta$ 4-sw-l         | 1584.96 | 0.99 |
| E157-R278 | $\beta$ 5a-L12         | 1890.48 | 0.93 |
| H205-S257 | $\beta$ 6- $\alpha$ 4  | 2664.00 | 0.87 |
| I137-N253 | $\beta$ 4- $\alpha$ 4  | 2758.08 | 0.81 |
| R190-E250 | sw-l- $\alpha$ 4       | 2948.64 | 0.90 |
| S202-R203 | sw-l-sw-l              | 3900.72 | 0.84 |

| NP Broken | domain                 | t(ns)   | occ  |
|-----------|------------------------|---------|------|
| K213-L335 | $\beta$ 6-NL           | 716.16  | 0.82 |
| N8-K326   | CS-NL                  | 910.32  | 0.97 |
| Y77-V329  | L3a-NL                 | 916.08  | 0.90 |
| L99-I183  | L5- $\alpha$ 3         | 1251.36 | 0.92 |
| V230-L232 | $\beta$ 7- $\beta$ 7   | 1341.84 | 0.94 |
| H191-S204 | sw-l-sw-l              | 1676.88 | 0.85 |
| T195-S201 | sw-l-sw-l              | 1820.40 | 0.91 |
| V194-E199 | sw-l-sw-l              | 1825.20 | 0.98 |
| A193-R203 | sw-l-sw-l              | 1833.84 | 0.98 |
| E215-K222 | $\beta$ 6- $\beta$ 7   | 2004.96 | 0.99 |
| E136-S204 | $\beta$ 4-sw-l         | 2673.84 | 0.96 |
| L139-E250 | $\beta$ 4- $\alpha$ 4  | 2675.76 | 0.96 |
| Y138-S204 | $\beta$ 4-sw-l         | 2688.00 | 0.99 |
| E250-I254 | $\alpha$ 4- $\alpha$ 4 | 2883.12 | 0.80 |
| NP Formed | domain                 | t(ns)   | occ  |
| K91-A233  | P-loop- $\beta$ 7      | 1118.64 | 0.99 |
| I183-K187 | $\alpha$ 3- $\alpha$ 3 | 1142.88 | 0.89 |
| K91-D231  | P-loop- $\beta$ 7      | 1323.60 | 0.93 |
| E215-Q218 | $\beta$ 6-L10          | 2143.68 | 0.83 |
| L232-I254 | $\beta$ 7- $\alpha$ 4  | 2809.92 | 0.83 |

**(B) Kin-only**

| HB Broken | domain                    | t(ns)   | occ  |
|-----------|---------------------------|---------|------|
| A5-V329   | CS-NL                     | 571.20  | 0.86 |
| S289-N327 | $\alpha$ 5-NL             | 579.36  | 0.92 |
| G291-N327 | L13-NL                    | 579.84  | 0.91 |
| S289-T296 | $\alpha$ 5- $\beta$ 8     | 591.36  | 0.81 |
| D288-N293 | $\alpha$ 5-L13            | 619.20  | 0.86 |
| E136-H191 | $\beta$ 4-sw-l            | 1284.72 | 0.90 |
| R190-D231 | sw-l- $\beta$ 7           | 1299.36 | 0.99 |
| A193-S201 | sw-l-sw-l                 | 1302.72 | 0.95 |
| T195-N198 | sw-l-sw-l                 | 1348.80 | 0.95 |
| D158-R161 | $\beta$ 5a-L8b            | 1355.76 | 0.91 |
| N216-Q221 | $\beta$ 6-L10             | 2125.20 | 0.93 |
| G245-D249 | L11- $\alpha$ 4           | 2318.64 | 0.84 |
| A246-E250 | $\alpha$ 4- $\alpha$ 4    | 2348.16 | 0.90 |
| V247-A251 | $\alpha$ 4- $\alpha$ 4    | 2743.92 | 0.82 |
| HB Formed | domain                    | t(ns)   | occ  |
| R203-E250 | sw-l- $\alpha$ 4          | 544.80  | 0.96 |
| D288-S289 | $\alpha$ 5- $\alpha$ 5    | 660.24  | 0.95 |
| E6-K10    | CS- $\beta$ 1             | 930.48  | 0.93 |
| R190-S206 | sw-l- $\beta$ 6           | 1333.68 | 0.83 |
| R278-A337 | L12-NL                    | 1780.08 | 0.83 |
| M1-D49    | CS- $\beta$ 1c/ $\beta$ 2 | 2441.28 | 0.97 |
| D3-R50    | CS- $\beta$ 2             | 2443.44 | 0.99 |

| NP Broken | domain                 | t(ns)   | occ  |
|-----------|------------------------|---------|------|
| D288-G292 | $\alpha$ 5-L13         | 628.56  | 0.97 |
| E6-T328   | CS-NL                  | 770.88  | 0.83 |
| K150-L153 | L8a-L8a                | 801.12  | 0.84 |
| E6-K326   | CS-NL                  | 915.60  | 0.81 |
| T195-S201 | sw-l-sw-l              | 1317.84 | 0.85 |
| E215-K222 | $\beta$ 6- $\beta$ 7   | 2191.92 | 0.86 |
| A243-V247 | L11- $\alpha$ 4        | 2307.84 | 0.86 |
| A246-D249 | $\alpha$ 4- $\alpha$ 4 | 2341.92 | 0.89 |
| R50-D64   | $\beta$ 2- $\alpha$ 1a | 2448.48 | 0.94 |
| V247-E250 | $\alpha$ 4- $\alpha$ 4 | 2754.48 | 0.84 |
| L248-K252 | $\alpha$ 4- $\alpha$ 4 | 2898.96 | 0.81 |
| NP Formed | domain                 | t(ns)   | occ  |
| Y228-L286 | $\beta$ 7- $\alpha$ 5  | 634.56  | 0.85 |
| Y228-S289 | $\beta$ 7- $\alpha$ 5  | 649.68  | 0.98 |
| N78-S289  | L3a- $\alpha$ 5        | 663.36  | 0.96 |
| R143-K150 | $\beta$ 5-L8a          | 864.96  | 0.89 |
| Y277-T336 | L12-NL                 | 2778.48 | 0.84 |
| Y277-L335 | L12-NL                 | 2782.80 | 0.90 |
| V275-L335 | L12-NL                 | 2790.96 | 0.95 |
| L268-L335 | $\alpha$ 4-NL          | 2799.60 | 0.84 |

**Supplementary File 2. Intra-kinesin hydrogen bonds (HB) and nonpolar (NP) contacts that break or form during each simulation.** The corresponding domain names, transition time, and average occupancy (occ) before breakage or after formation of a contact are shown. Only clear transitions were considered where the average occupancy before breakage or after formation is greater than 80%. **(A) ATP, (B) Kin-only. Next page: (C) ADP+Pi, (D) ADP<sub>pre</sub>, (E) APO<sub>α</sub>, and (F) APO.**
