# Supplementary material for: Kinesin motility is driven by subdomain dynamics
Source: eLife journal article supplement (doi:10.7554/elife.28948), 2017-11-07
Supplement: supp [file elife-28948-supp-v1.zip › elife_poa_e28948_Supplementary_File_3.pdf]

**(C) ADP+Pi**

| HB Broken | domain                  | t(ns)   | occ  |
|-----------|-------------------------|---------|------|
| R190-D231 | sw-l- $\beta$ 7         | 947.28  | 0.99 |
| H191-R203 | sw-l-sw-l               | 971.52  | 0.90 |
| T195-N198 | sw-l-sw-l               | 972.00  | 0.94 |
| N198-H200 | sw-l-sw-l               | 1011.12 | 0.87 |
| A193-S201 | sw-l-sw-l               | 1042.80 | 0.98 |
| E36-V51   | $\beta$ 1a/b- $\beta$ 2 | 1350.96 | 0.86 |
| E136-H191 | $\beta$ 4-sw-l          | 1354.08 | 0.93 |
| E236-N255 | sw-II- $\alpha$ 4       | 1480.56 | 0.96 |
| N216-Q221 | $\beta$ 6-L10           | 2002.56 | 0.95 |
| Q214-L223 | $\beta$ 6- $\beta$ 7    | 2632.80 | 0.87 |
| R203-E236 | sw-l-sw-II              | 5343.84 | 0.91 |
| HB Formed | domain                  | t(ns)   | occ  |
| E157-R278 | $\beta$ 5a-L12          | 169.44  | 0.99 |
| E136-R190 | $\beta$ 4-sw-l          | 1691.52 | 0.97 |
| V73-G225  | $\alpha$ 1b- $\beta$ 7  | 2112.96 | 0.85 |
| E199-R203 | sw-l-sw-l               | 3814.80 | 0.85 |
| D147-R171 | L8a- $\beta$ 5c         | 5136.96 | 0.89 |

| NP Broken | domain               | t(ns)   | occ  |
|-----------|----------------------|---------|------|
| V194-E199 | sw-l-sw-l            | 977.04  | 0.97 |
| A193-R203 | sw-l-sw-l            | 1019.76 | 0.96 |
| T195-S201 | sw-l-sw-l            | 1024.32 | 0.93 |
| V192-S202 | sw-l-sw-l            | 1345.92 | 0.82 |
| H191-S204 | sw-l-sw-l            | 1346.40 | 0.84 |
| E215-K222 | $\beta$ 6- $\beta$ 7 | 2020.08 | 0.98 |
| N198-S201 | sw-l-sw-l            | 3717.12 | 0.87 |
| NP Formed | domain               | t(ns)   | occ  |
| G76-S224  | L3a- $\beta$ 7       | 2109.84 | 0.83 |

**(D) ADP<sub>pre</sub>**

| HB Broken | domain                   | t(ns)   | occ  |
|-----------|--------------------------|---------|------|
| N216-Q221 | $\beta$ 6-L10            | 390.00  | 0.93 |
| H200-S204 | sw-l-sw-l                | 1042.32 | 0.81 |
| N198-S202 | sw-l-sw-l                | 1054.56 | 0.80 |
| N196-H200 | sw-l-sw-l                | 1078.32 | 0.95 |
| M197-S201 | sw-l-sw-l                | 1091.76 | 0.97 |
| D37-T38   | $\beta$ 1a/b- $\beta$ 1b | 2039.52 | 0.83 |
| HB Formed | domain                   | t(ns)   | occ  |
| Q86-S235  | P-loop-sw-II             | 151.44  | 0.89 |
| E6-K68    | CS- $\alpha$ 1b          | 386.16  | 0.96 |
| K91-D231  | P-loop- $\beta$ 7        | 717.60  | 0.86 |
| N78-S224  | L3a- $\beta$ 7           | 2367.36 | 0.92 |

| NP Broken | None.                 |         |      |
|-----------|-----------------------|---------|------|
| NP Formed | domain                | t(ns)   | occ  |
| R16-G90   | $\beta$ 1-P-loop      | 440.64  | 0.85 |
| L223-N293 | $\beta$ 7-L13         | 2388.00 | 0.92 |
| N78-L223  | L3a- $\beta$ 7        | 2397.60 | 0.89 |
| V162-K222 | $\beta$ 5b- $\beta$ 7 | 2420.16 | 0.91 |

**(E) APO <sub>$\alpha$</sub>** 

| HB Broken | domain               | t(ns)  | occ  |
|-----------|----------------------|--------|------|
| Q86-S303  | P-loop- $\beta$ 8    | 416.64 | 0.84 |
| HB Formed | domain               | t(ns)  | occ  |
| Q214-N216 | $\beta$ 6- $\beta$ 6 | 723.36 | 0.87 |

| NP Broken | domain                   | t(ns)  | occ  |
|-----------|--------------------------|--------|------|
| V238-A243 | L11-L11                  | 182.88 | 0.87 |
| E215-K222 | $\beta$ 6- $\beta$ 7     | 613.92 | 0.87 |
| L126-N216 | $\beta$ 4- $\beta$ 6     | 646.56 | 0.83 |
| NP Formed | domain                   | t(ns)  | occ  |
| V238-K252 | L11- $\alpha$ 4          | 191.28 | 0.94 |
| F128-L223 | $\beta$ 4- $\beta$ 7     | 702.72 | 0.81 |
| L126-T219 | $\beta$ 4-L10            | 736.08 | 0.88 |
| V70-Y118  | $\alpha$ 1b- $\alpha$ 2b | 762.48 | 0.93 |

**(F) APO**

| HB Broken | None.                             |         |      |
|-----------|-----------------------------------|---------|------|
| HB Formed | domain                            | t(ns)   | occ  |
| D49-K323  | $\beta$ 1c/ $\beta$ 2- $\alpha$ 6 | 1206.00 | 0.94 |
| K237-A243 | L11-L11                           | 3672.48 | 0.86 |

| NP Broken | None.                  |         |      |
|-----------|------------------------|---------|------|
| NP Formed | domain                 | t(ns)   | occ  |
| V11-K323  | $\beta$ 1- $\alpha$ 6  | 1221.84 | 0.94 |
| Q320-I325 | $\alpha$ 6- $\alpha$ 6 | 1680.96 | 0.85 |
| S239-E244 | L11-L11                | 3793.68 | 0.87 |

**(A) ATP**

| Hbond               | Domain     | Occ. (time)    |
|---------------------|------------|----------------|
| S259- $\alpha$ E415 | $\alpha 4$ | 0.95           |
| K237- $\alpha$ E414 | L11        | 0.80           |
| R161- $\beta$ D427  | L8b        | 0.99           |
| R278- $\beta$ D427  | L12        | 0.97           |
| E157- $\beta$ E420  | $\beta 5a$ | 0.89           |
| R278- $\beta$ E420  | L12        | 0.99 (1886.88) |
| Nonpolar            | Domain     | Occ. (time)    |
| K252- $\alpha$ G412 | $\alpha 4$ | 0.97           |
| K256- $\alpha$ V409 | $\alpha 4$ | 0.93           |
| S259- $\alpha$ V409 | $\alpha 4$ | 0.88           |
| S239- $\alpha$ Y108 | L11        | 0.85           |
| Y274- $\beta$ E431  | L12        | 0.91           |
| Y274- $\beta$ Q434  | L12        | 0.88           |
| H156- $\beta$ E420  | $\beta 5a$ | 0.85           |
| Y274- $\beta$ D427  | L12        | 0.84           |
| Y274- $\beta$ S430  | L12        | 0.83           |
| H156- $\beta$ M416  | $\beta 5a$ | 0.81           |
| E157- $\beta$ E420  | $\beta 5a$ | 0.90 (795.60)  |

**(B) ADP+Pi**

| Hbond               | Domain     | Occ. (time)    |
|---------------------|------------|----------------|
| S259- $\alpha$ E415 | $\alpha 4$ | 0.97           |
| N263- $\alpha$ R402 | $\alpha 4$ | 0.97           |
| K237- $\alpha$ E414 | L11        | 0.96           |
| K237- $\alpha$ E417 | L11        | 0.91           |
| K313- $\alpha$ E423 | $\alpha 6$ | 0.84           |
| R161- $\beta$ D427  | L8b        | 1.00           |
| R278- $\beta$ E420  | L12        | 0.97           |
| E157- $\beta$ E420  | $\beta 5a$ | 0.96           |
| R278- $\beta$ D427  | L12        | 0.90           |
| Y274- $\beta$ E431  | L12        | 0.81 (1497.12) |
| Nonpolar            | Domain     | Occ. (time)    |
| S259- $\alpha$ V409 | $\alpha 4$ | 0.99           |
| K256- $\alpha$ V409 | $\alpha 4$ | 0.98           |
| K256- $\alpha$ G410 | $\alpha 4$ | 0.87           |
| S239- $\alpha$ Y108 | L11        | 0.84           |
| K252- $\alpha$ G412 | $\alpha 4$ | 0.84           |
| K256- $\alpha$ G410 | $\alpha 4$ | 0.90 (183.60)  |
| H156- $\beta$ E420  | $\beta 5a$ | 0.99           |
| Y274- $\beta$ D427  | L12        | 0.94           |
| H156- $\beta$ M416  | $\beta 5a$ | 0.92           |
| E157- $\beta$ E420  | $\beta 5a$ | 0.92           |
| Y274- $\beta$ Q434  | L12        | 0.91           |
| Y274- $\beta$ E431  | L12        | 0.91           |
| E157- $\beta$ S423  | $\beta 5a$ | 0.90           |
| R278- $\beta$ D427  | L12        | 0.86           |
| Y274- $\beta$ S430  | L12        | 0.84           |
| K159- $\beta$ T419  | $\beta 5a$ | 0.82           |

**(C) ADP<sub>pre</sub>**

| Hbond               | Domain     | Occ. (time)    |
|---------------------|------------|----------------|
| K237- $\alpha$ E417 | L11        | 0.81           |
| R278- $\beta$ E420  | L12        | 0.98 (728.40)  |
| R284- $\beta$ E420  | $\alpha 5$ | 0.97 (716.88)  |
| R278- $\beta$ D427  | L12        | 0.98 {879.60}  |
| Nonpolar            | Domain     | Occ. (time)    |
| K256- $\alpha$ V409 | $\alpha 4$ | 0.95           |
| S259- $\alpha$ V409 | $\alpha 4$ | 0.83           |
| V329- $\alpha$ R422 | NL         | 0.94 (1851.84) |
| V329- $\alpha$ E423 | NL         | 0.92 (1857.84) |
| L317- $\alpha$ G416 | $\alpha 6$ | 0.85 (388.32)  |
| Y274- $\beta$ E431  | L12        | 0.89           |
| Y274- $\beta$ Q434  | L12        | 0.88           |
| Y274- $\beta$ S430  | L12        | 0.87           |
| Y274- $\beta$ D427  | L12        | 0.82           |

**(D) APO <sub>$\alpha$</sub>** 

| Hbond               | Domain     | Occ. (time)   |
|---------------------|------------|---------------|
| S259- $\alpha$ E415 | $\alpha 4$ | 0.94          |
| E270- $\alpha$ R402 | $\alpha 4$ | 0.91          |
| K44- $\alpha$ E423  | L2         | 0.90          |
| R321- $\alpha$ E415 | $\alpha 6$ | 0.87          |
| K44- $\alpha$ E420  | L2         | 0.87 (307.44) |
| S235- $\alpha$ E414 | sw-II      | 0.83 {159.60} |
| R161- $\beta$ D427  | L8b        | 1.00          |
| Nonpolar            | Domain     | Occ. (time)   |
| L317- $\alpha$ G416 | $\alpha 6$ | 0.88          |
| Y274- $\beta$ D427  | L12        | 0.97          |
| Y274- $\beta$ Q434  | L12        | 0.95          |
| Y274- $\beta$ E431  | L12        | 0.94          |
| Y274- $\beta$ S430  | L12        | 0.88          |

**(E) APO**

| Hbond               | Domain     | Occ. (time)    |
|---------------------|------------|----------------|
| K237- $\alpha$ E414 | L11        | 0.89           |
| K44- $\alpha$ E423  | L2         | 0.89           |
| D279- $\beta$ R264  | L12        | 0.99           |
| R161- $\beta$ D427  | L8b        | 0.99           |
| R278- $\beta$ N424  | L12        | 0.96           |
| R278- $\beta$ E196  | L12        | 0.83           |
| R284- $\beta$ E420  | $\alpha 5$ | 0.90 (2399.76) |
| Nonpolar            | Domain     | Occ. (time)    |
| K256- $\alpha$ V409 | $\alpha 4$ | 0.95           |
| S259- $\alpha$ V409 | $\alpha 4$ | 0.94           |
| L248- $\alpha$ Y108 | $\alpha 4$ | 0.90           |
| K252- $\alpha$ G412 | $\alpha 4$ | 0.89           |
| L317- $\alpha$ G416 | $\alpha 6$ | 0.85           |
| Y274- $\beta$ Q434  | L12        | 0.96           |
| Y274- $\beta$ E431  | L12        | 0.95           |
| Y274- $\beta$ S430  | L12        | 0.87           |

**Supplementary File 3. Kinesin-MT contacts.** For a residue pair in the first column,  $\alpha$  and  $\beta$  in front of the second residue denote the tubulin type. Domain: domain name to which the kinesin residue belongs (Figure Supplement 1). Contacts with  $\alpha$ - or  $\beta$ -tubulin are ordered based on occupancy. Contacts whose occupancy after breakage or formation is greater than 80% have the transition time (nanoseconds) in parentheses (formation) or in curly brackets (breakage).
