# Supplementary figures and images for: Kinesin motility is driven by subdomain dynamics
Source: eLife journal article supplement (doi:10.7554/elife.28948), 2017-11-07

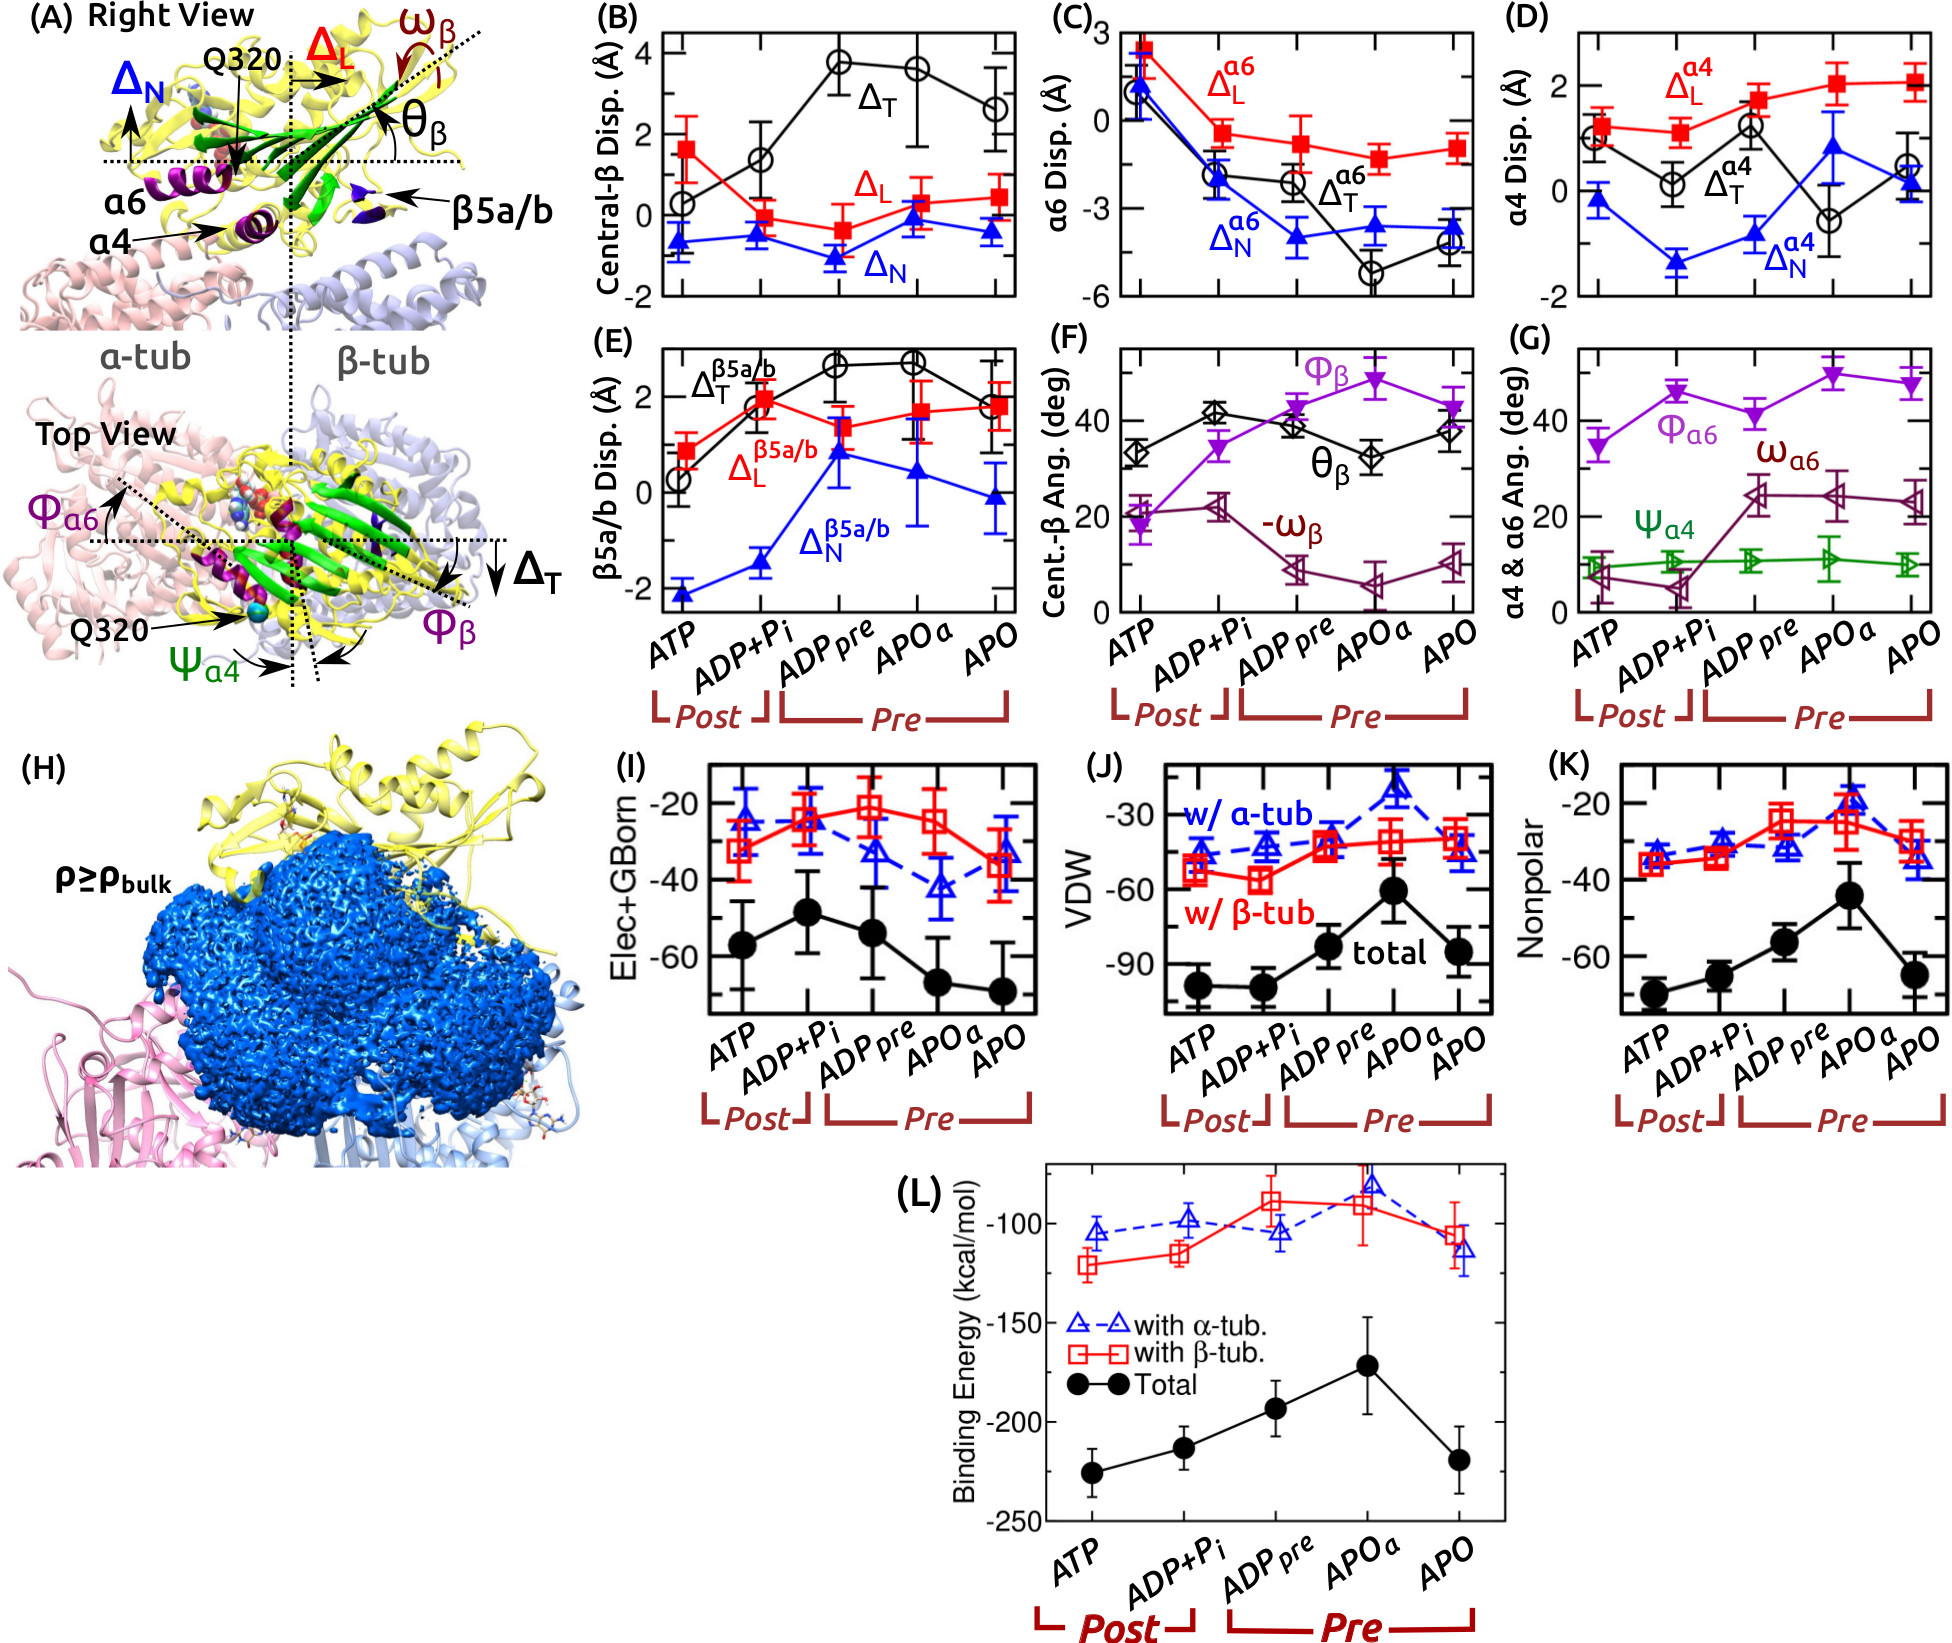

Supplement: supp [file elife-28948-supp-v1.zip › elife_poa_e28948_Figure_3_figure_supplement_1.jpg]

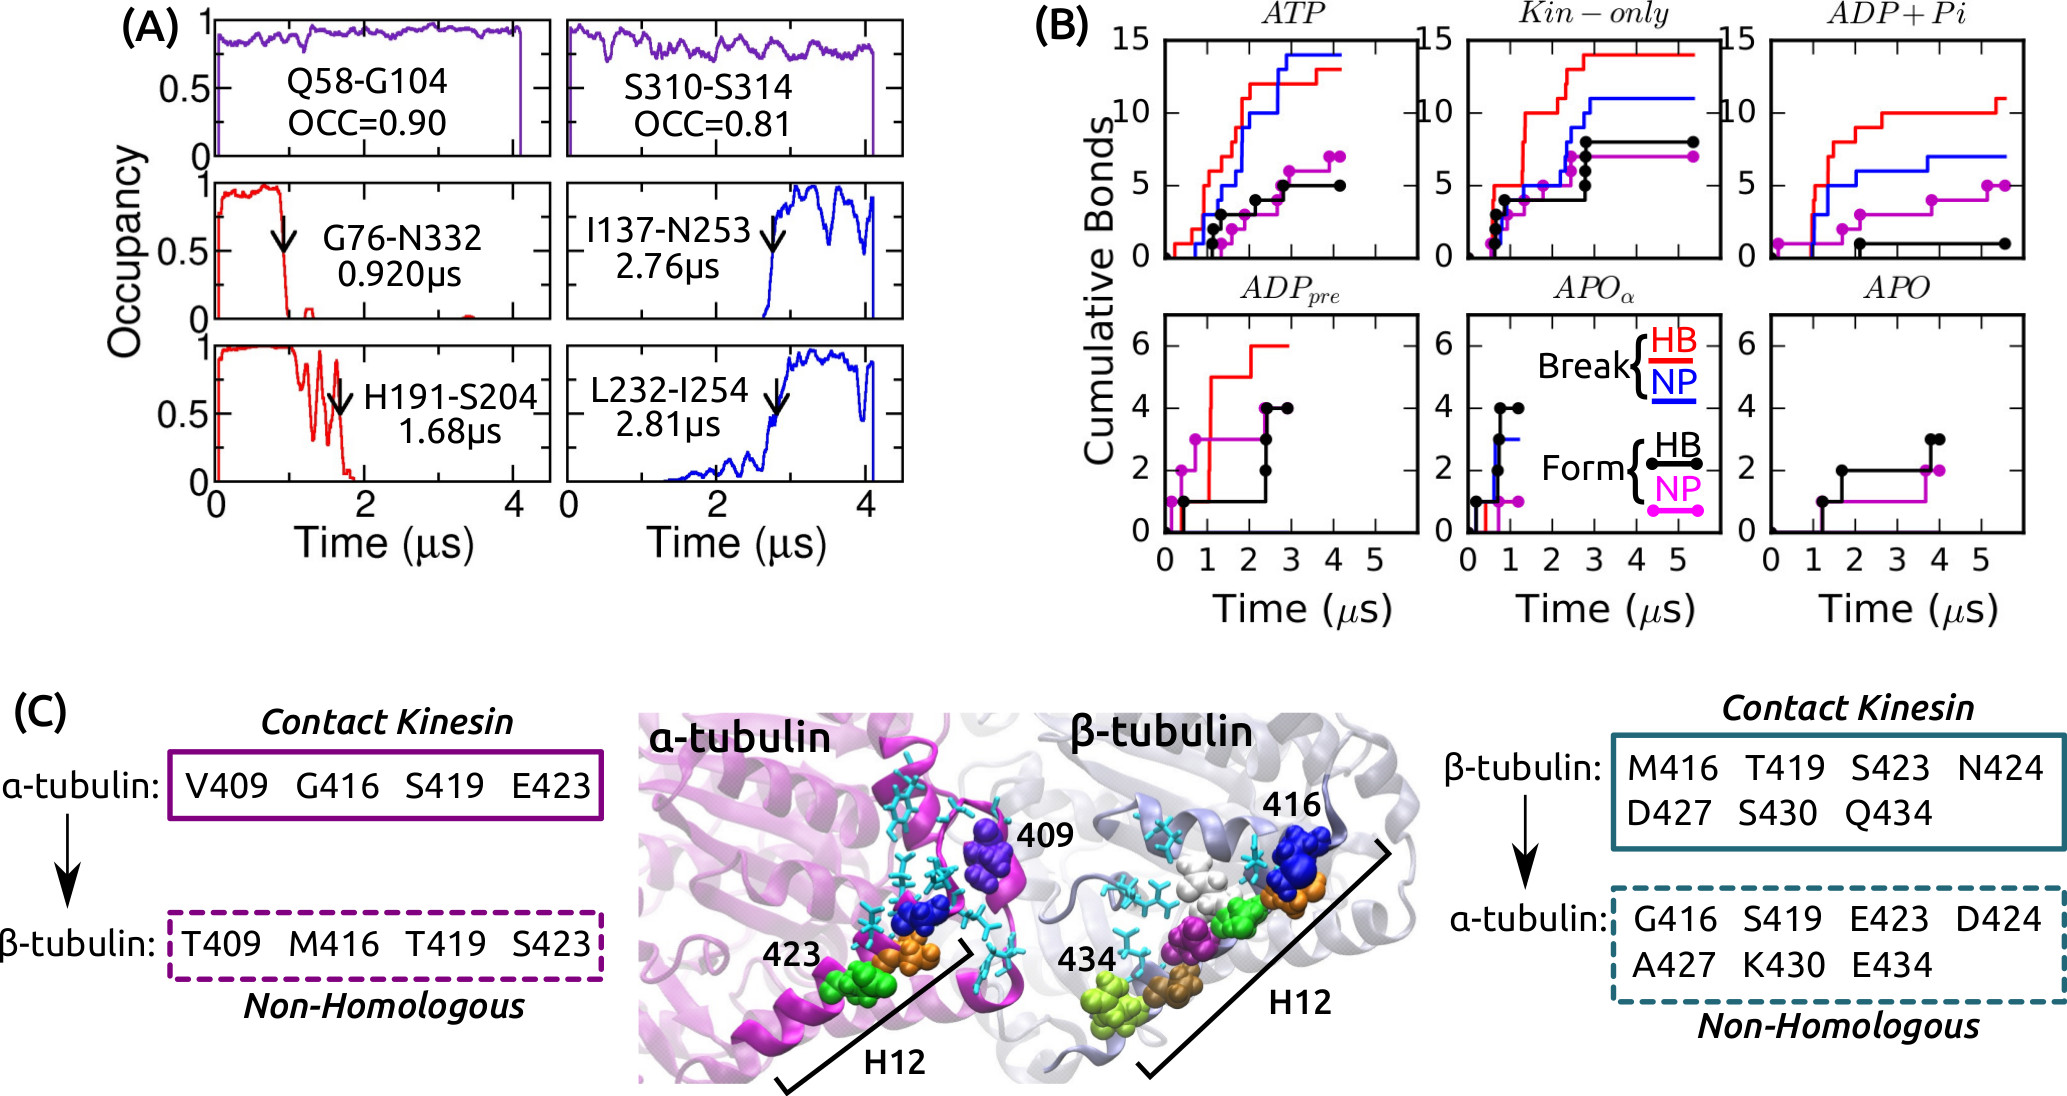

Supplement: supp [file elife-28948-supp-v1.zip › elife_poa_e28948_Figure_4_figure_supplement_1.jpg]

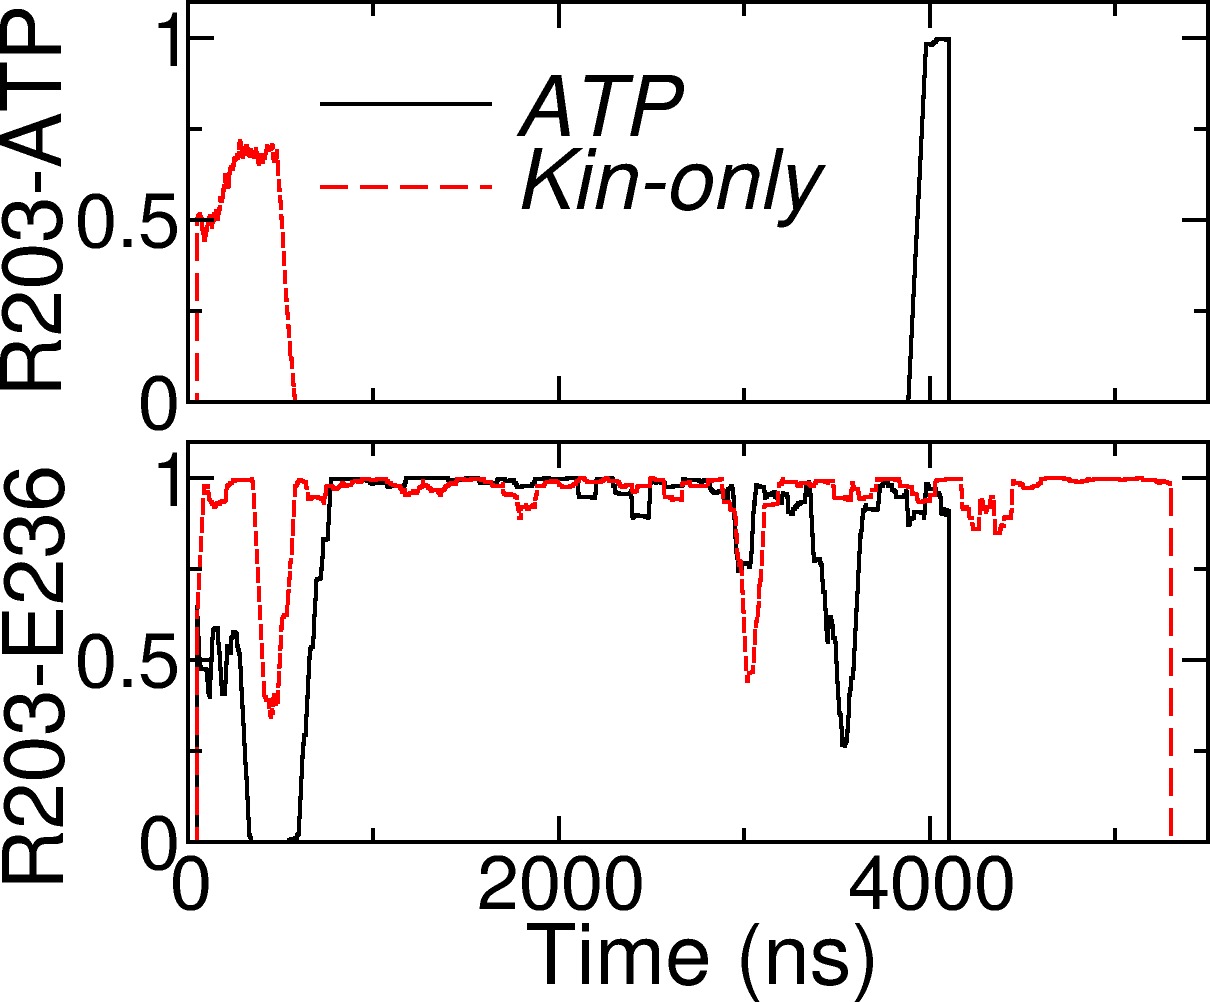

Supplement: supp [file elife-28948-supp-v1.zip › elife_poa_e28948_Figure_7_figure_supplement_1.jpg]

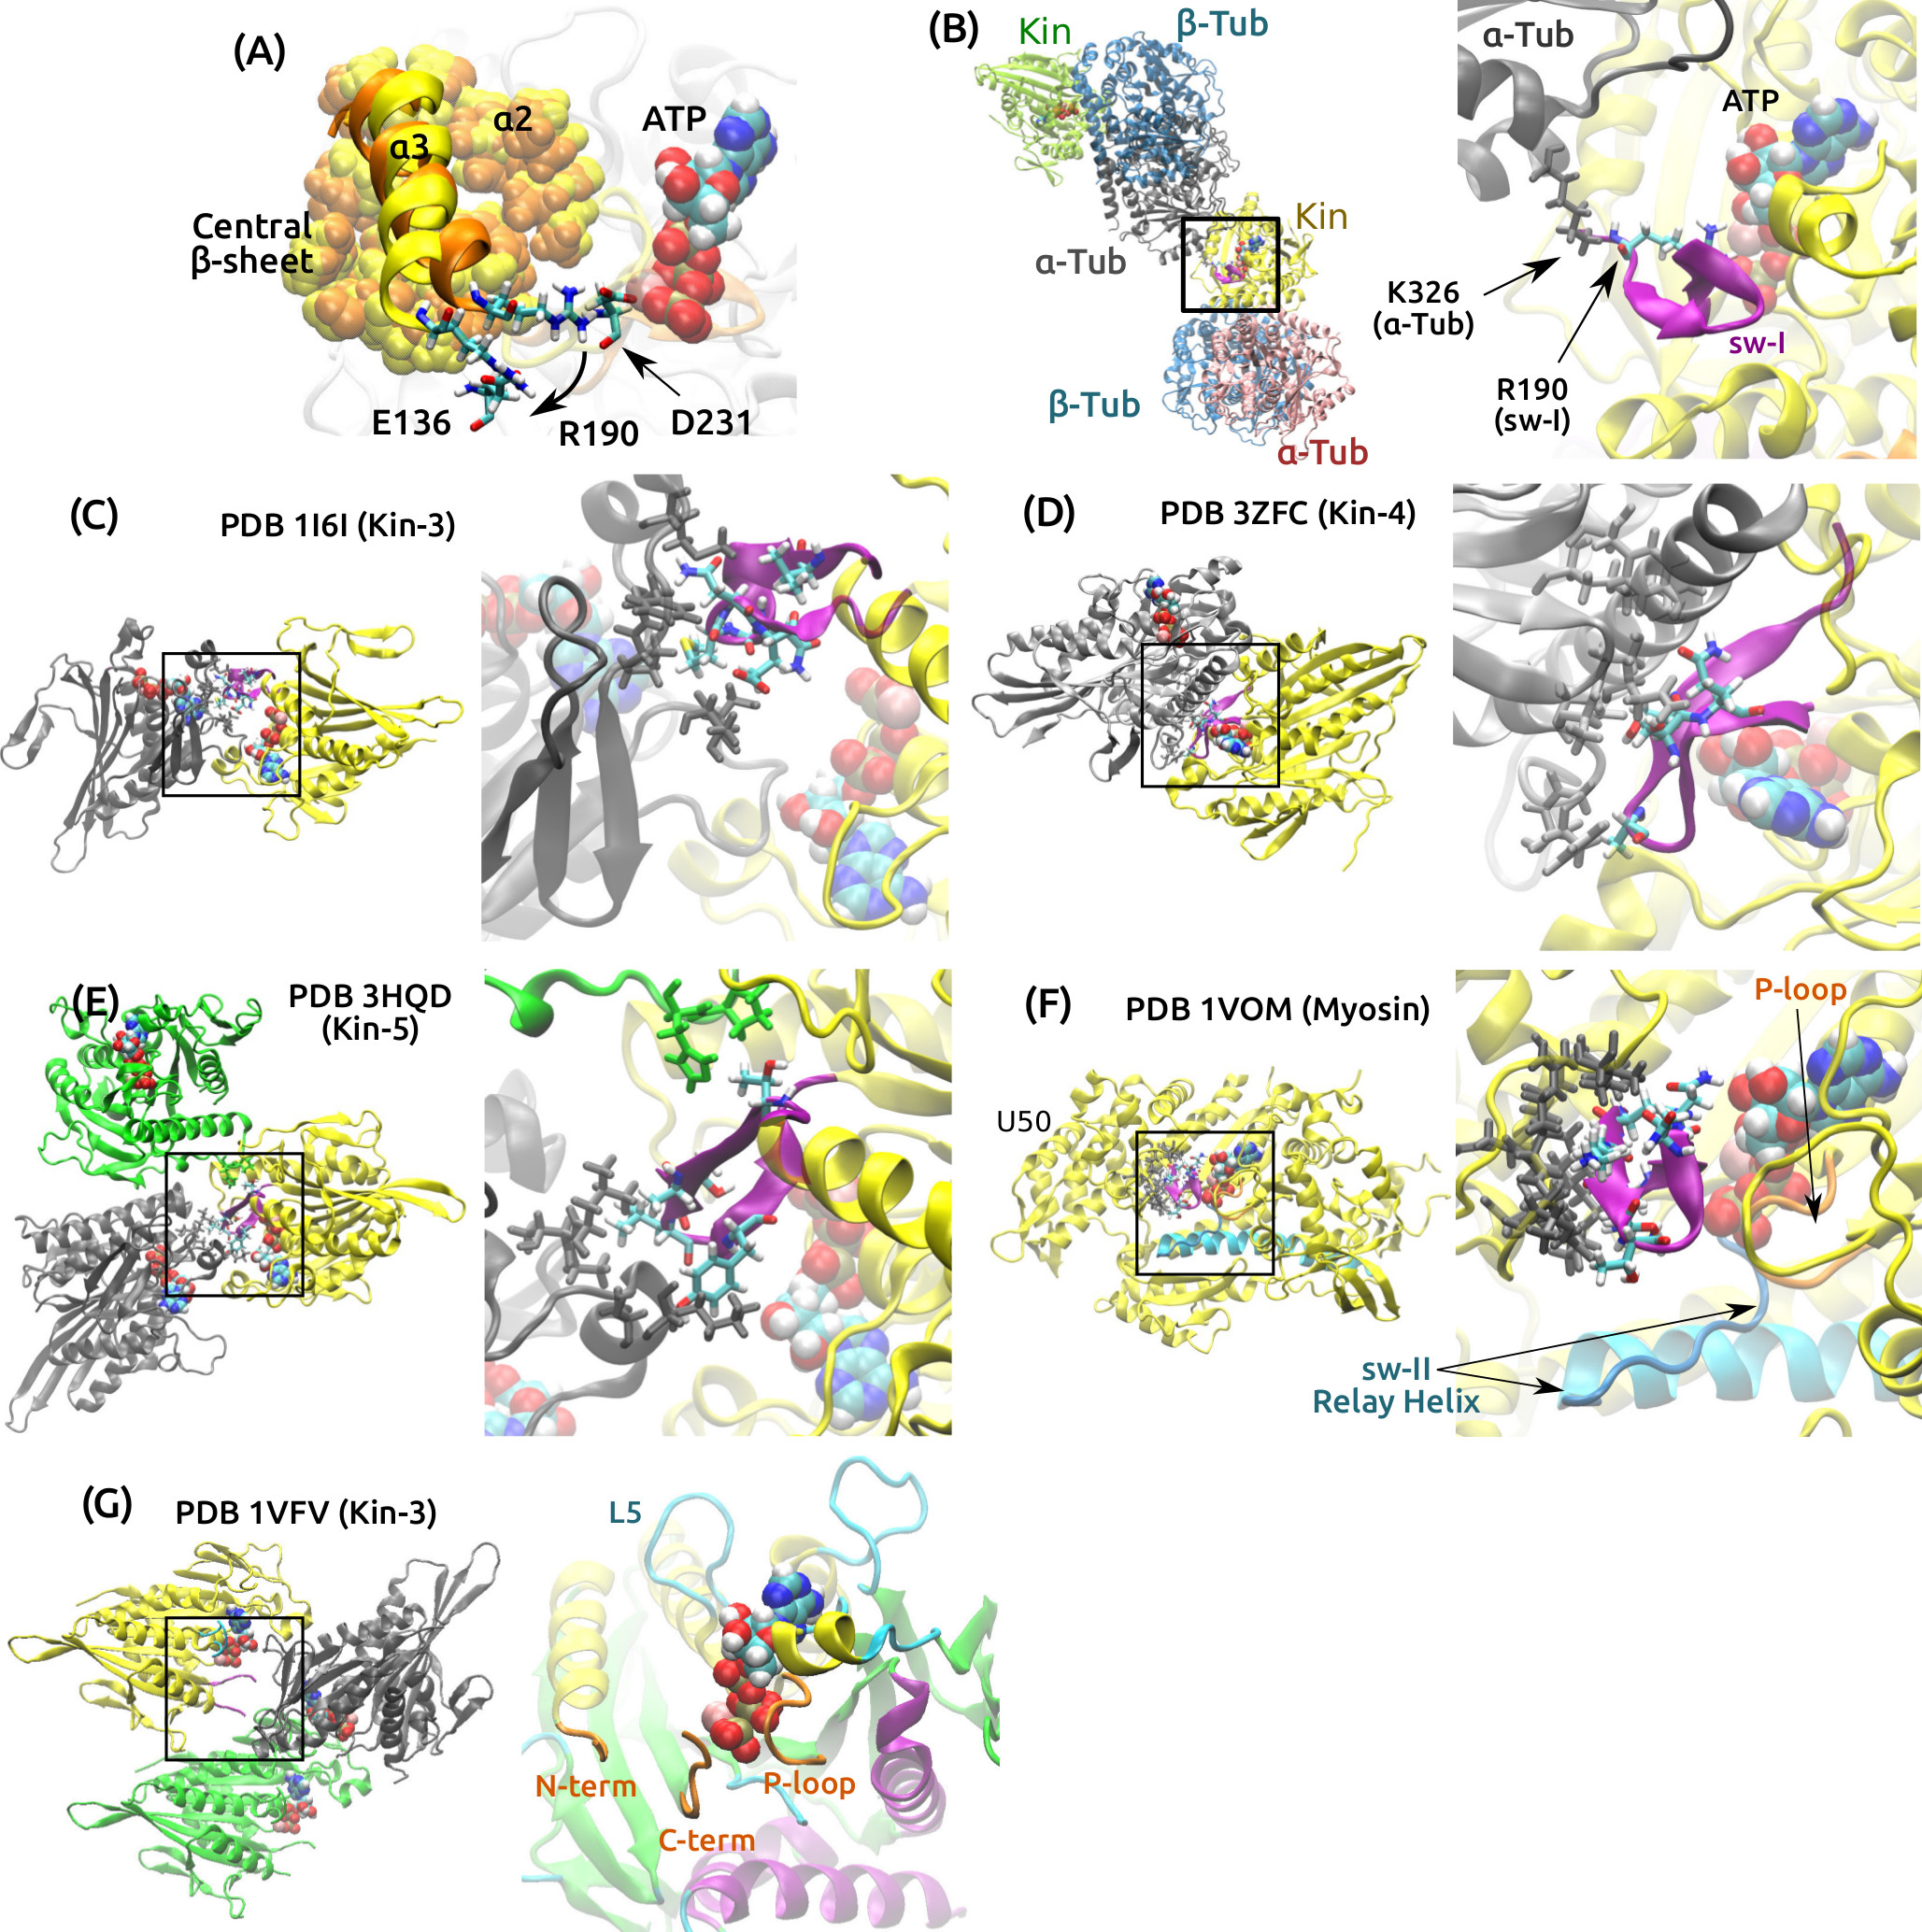

Supplement: supp [file elife-28948-supp-v1.zip › elife_poa_e28948_Figure_5_figure_supplement_1.jpg]

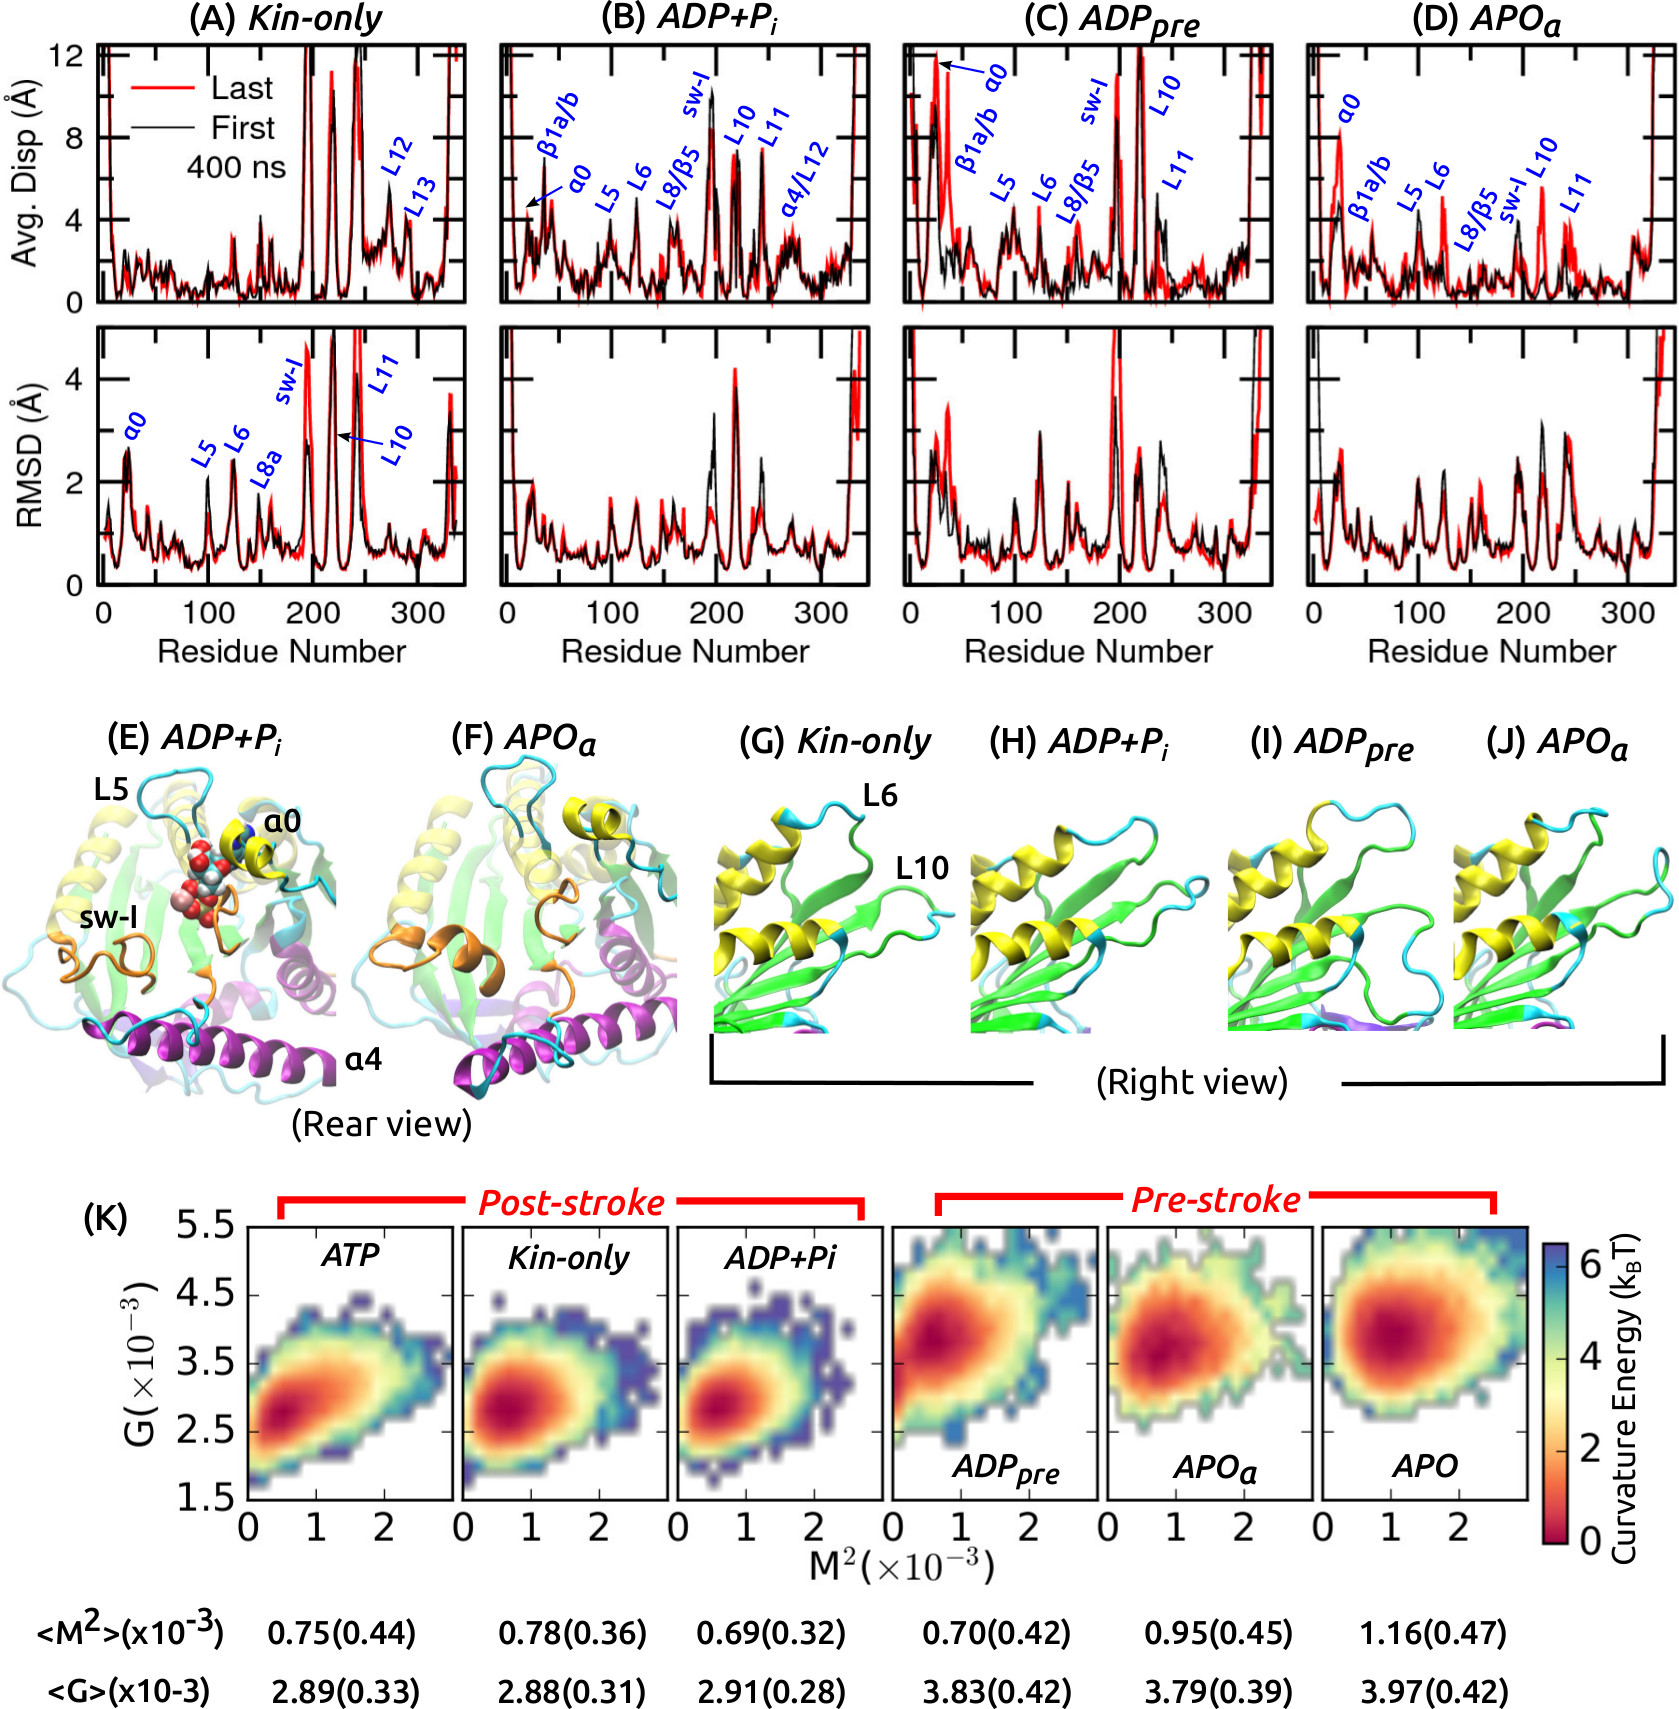

Supplement: supp [file elife-28948-supp-v1.zip › elife_poa_e28948_Figure_2_figure_supplement_1.jpg]

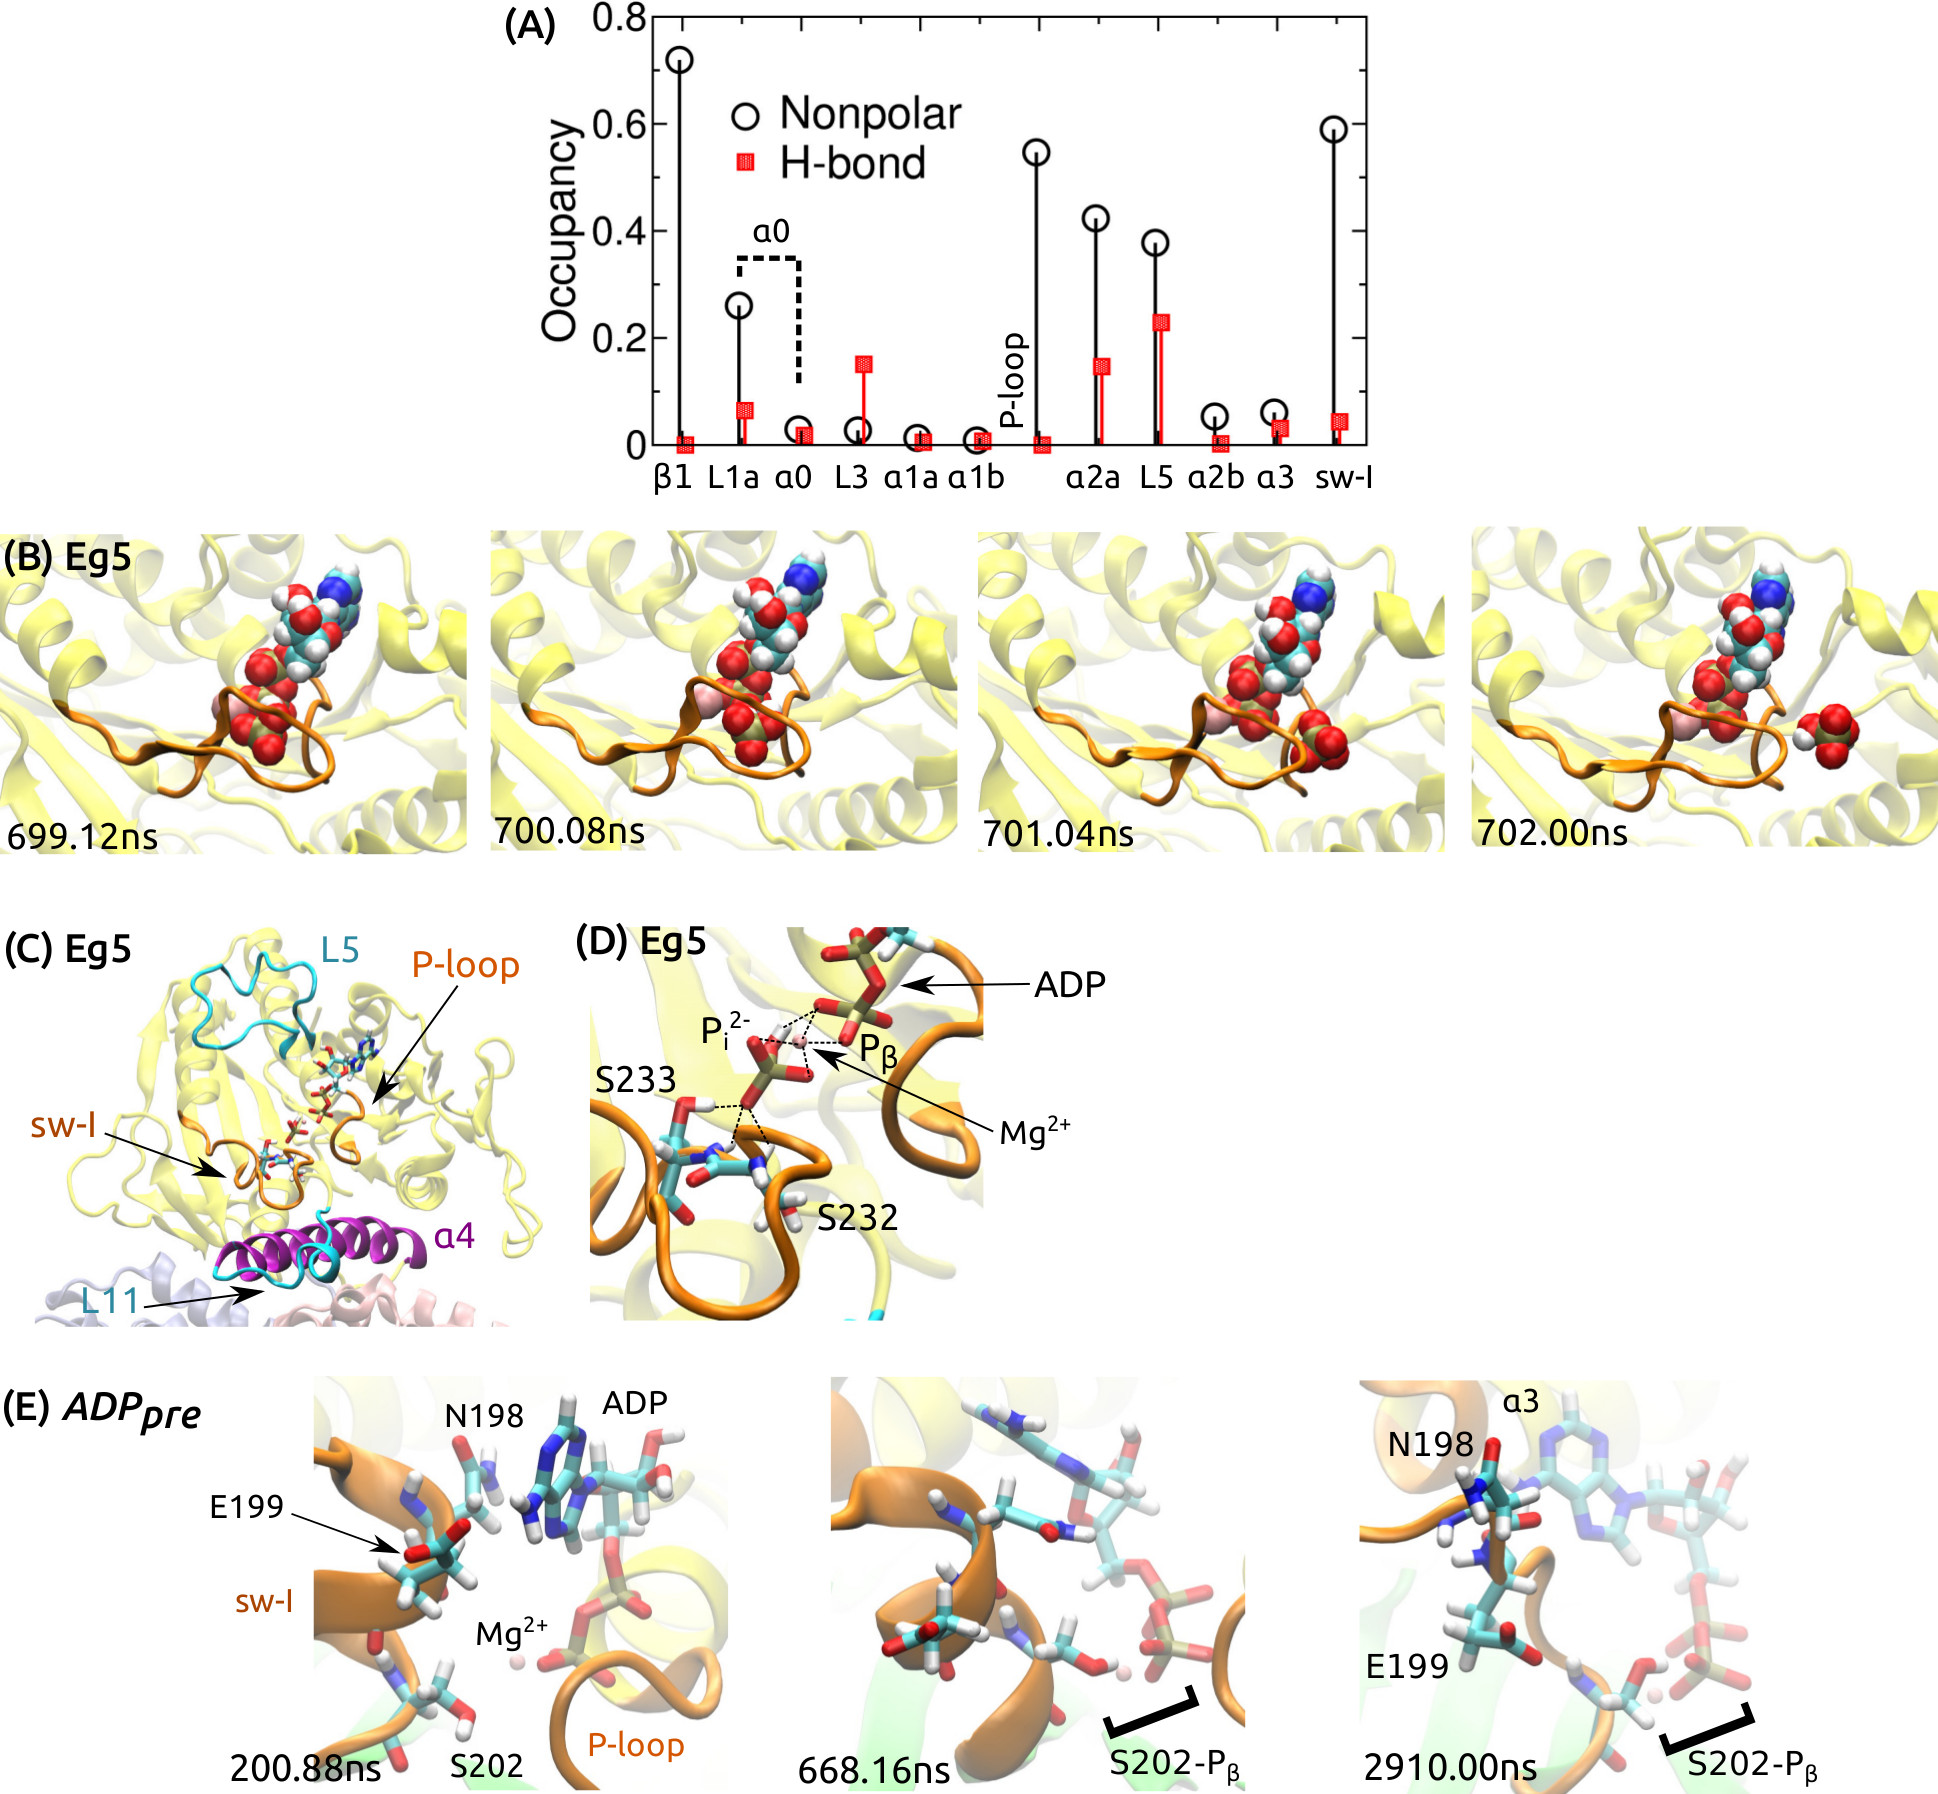

Supplement: supp [file elife-28948-supp-v1.zip › elife_poa_e28948_Figure_5_figure_supplement_2.jpg]
